# Supplementary material for: A Prospective Study of Eplerenone in the Treatment of Patients with Glomerulonephritis
Source: MDPI journal article supplement (doi:10.3390/biomedicines11123340), 2023-12-18
Supplement: s1 [file s1]

Supplemental Table S1. Differences of serum creatinine, eGFR, urine protein, SBP, DBP and K<sup>+</sup> levels between groups at different time points.

| Variable                              | Patients Treated with Eplerenone | Controls      | p    |
|---------------------------------------|----------------------------------|---------------|------|
| Serum creatinine (mg/dl ± SD)         |                                  |               |      |
| 3 months                              | 1.077 ± 0.29                     | 1.296 ± 0.557 | 0.08 |
| 6 months                              | 1.092 ± 0.28                     | 1.197 ± 0.54  | 0.38 |
| 12 months                             | 1.091 ± 0.3                      | 1.292 ± 0.664 | 0.19 |
| eGFR (ml/min/1.73m <sup>2</sup> ± SD) |                                  |               |      |
| 3 months                              | 81.5 ± 29.5                      | 65.4 ± 30.5   | 0.06 |
| 6 months                              | 79 ± 27.2                        | 69.5 ± 28.1   | 0.19 |
| 12 months                             | 81 ± 32.1                        | 66.6 ± 29.8   | 0.09 |
| Urine protein (mg/24h ± SD)           |                                  |               |      |
| 3 months                              | 1555 ± 2083                      | 1613 ± 2982   | 0.8  |
| 6 months                              | 1237 ± 1491                      | 1411 ± 1819   | 0.7  |
| 12 months                             | 1152 ± 1363                      | 1718 ± 2611   | 0.36 |
| Systolic blood pressure (mmHg ± SD)   |                                  |               |      |
| 3 months                              | 126.5±14,5                       | 129 ± 19      | 0.6  |
| 6 months                              | 119.3±13                         | 127.4 ± 22    | 0.12 |
| 12 months                             | 125.2 ± 10.3                     | 126 ± 16.1    | 0.87 |
| Diastolic blood pressure (mmHg)       |                                  |               |      |
| 3 months                              | 78.2 ± 9.3                       | 78.5 ± 8.4    | 0.91 |
| 6 months                              | 76.3 ± 7.9                       | 76.4 ± 8.7    | 0.94 |
| 12 months                             | 78.9 ± 9.9                       | 81.9 ± 9.75   | 0.3  |
| Serum K <sup>+</sup> (meq/l)          |                                  |               |      |
| 3 months                              | 4.64 ± 0.36                      | 4.57 ± 0.53   | 0.58 |
| 6 months                              | 4.51 ± 0.4                       | 4.52 ± 0.45   | 0.89 |
| 12 months                             | 4.52 ± 0.37                      | 4.56 ± 0.51   | 0.74 |
